# Supplementary material for: Theoretical investigation of atmospheric chemistry of volatile anaesthetic sevoflurane: reactions with the OH radicals and atmospheric fate of the alkoxy radical (CF3)2CHOCHFO: thermal decomposition vs. oxidation
Source: Royal Society of Chemistry journal article supplement (doi:10.1039/c3nj01408h), 2014-01-01
Supplement: c3nj01408h1.pdf [file c3nj01408h1.pdf]

## **SUPPORTING INFORMATION**

### **Theoretical Investigation on Atmospheric Chemistry of Volatile Anaesthetic Sevoflurane: Reactions with the OH Radicals and Atmospheric Fate of the Alkoxy Radical (CF<sub>3</sub>)<sub>2</sub>CHOCHFO: Thermal Decomposition vs Oxidation**

Bhupesh Kumar Mishra<sup>a</sup>, Makroni Lily<sup>b</sup>, Arup Kumar Chakrabartty<sup>a</sup>, Debajyoti Bhattacharjee<sup>a</sup>, Ramesh Chandra Deka<sup>a\*</sup> and Asit K Chandra<sup>b\*\*</sup>

<sup>a</sup>Department of Chemical Sciences, Tezpur University, Tezpur, Assam – 784 028, India

<sup>b</sup>Department of Chemistry, North - Eastern Hill University, Shillong, 793 022, India

\*Correspondence author, Email: [ramesh@tezu.ernet.in](mailto:ramesh@tezu.ernet.in); Fax: +91 3712267005; Tel: +91 3712267008

\*\*Correspondence author, Email: [akchandra@nehu.ac.in](mailto:akchandra@nehu.ac.in); Fax: +91 3642550486; Tel.: +91 3642722622

**Table S1.** Harmonic vibrational frequencies of reactants, reactant complexes, transition states, product complexes and products at M06-2X/6-31+G(d,p) level of theory.

| <b>Species</b> | <b>Vibrational frequencies (cm<sup>-1</sup>)</b>                                                                                                                                                                                                |
|----------------|-------------------------------------------------------------------------------------------------------------------------------------------------------------------------------------------------------------------------------------------------|
| SEV 1          | 36, 55, 68, 97, 149, 181, 219, 293, 297, 332, 366, 449, 522, 537, 552, 580, 613, 697, 755, 905, 936, 1078, 1097, 1159, 1171, 1230, 1233, 1272, 1300, 1311, 1322, 1355, 1421, 1437, 1455, 1534, 3119, 3127, 3226                                 |
| SEV 2          | 36, 87, 100, 113, 162, 210, 219, 295, 306, 330, 332, 477, 521, 536, 549, 569, 620, 700, 766, 886, 928, 1027, 1105, 1161, 1176, 1229, 1242, 1272, 1306, 1308, 1326, 1360, 1413, 1422, 1463, 1541, 3142, 3144, 3219,                              |
| RC1            | 31, 46, 59, 66, 78, 105, 126, 130, 167, 200, 230, 308, 309, 343, 348, 375, 467, 543, 558, 574, 600, 631, 722, 778, 931, 958, 1094, 1118, 1192, 1205, 1230, 1258, 1282, 1319, 1356, 1365, 1389, 1475, 1496, 1519, 1589, 3160, 3190, 3252, 3878   |
| RC2a           | 34, 40, 45, 61, 88, 110, 159, 174, 197, 224, 233, 309, 314, 342, 380, 450, 464, 547, 561, 573, 586, 632, 723, 779, 933, 960, 1060, 1099, 1186, 1214, 1256, 1259, 1297, 1320, 1355, 1369, 1391, 1480, 1497, 1515, 1583, 3165, 3176, 3263, 3855   |
| RC2b           | 25, 42, 67, 70, 88, 112, 116, 147, 161, 195, 226, 293, 297, 331, 364, 374, 452, 521, 536, 553, 584, 612, 698, 756, 901, 934, 1074, 1099, 1159, 1169, 1224, 1268, 1304, 1310, 1319, 1417, 1434, 1456, 1539, 3123, 3137, 3232, 3764               |
| TS1            | 2118i, 36, 56, 65, 75, 119, 163, 172, 187, 232, 307, 310, 341, 348, 378, 390, 478, 561, 563, 575, 581, 637, 728, 790, 853, 979, 992, 1091, 1107, 1133, 1216, 1251, 1262, 1280, 1307, 1326, 1365, 1386, 1414, 1514, 1537, 1585, 3198, 3280, 3899 |
| TS2a           | 1822i, 30, 36, 64, 80, 108, 143, 170, 199, 221, 276, 306, 310, 341, 377, 459, 545, 560, 575, 600, 634, 672, 723, 781, 856, 936, 953, 1087, 1130, 1186, 1190, 1259, 1272, 1300, 1333, 1346, 1375, 1386, 1436, 1473, 1487, 1567, 3199, 3232, 3913 |
| TS2b           | 1370i, 36, 37, 60, 69, 82, 127, 150, 186, 219, 245, 280, 296, 331, 352, 445, 522, 537, 553, 570, 610, 741, 758, 845, 910, 939, 1094, 1130, 1145, 1159, 1212, 1235, 1268, 1298, 1311, 1320, 1354, 1384, 1421, 1436, 1551, 3129, 3133, 3766       |
| PC1            | 35, 45, 67, 85, 102, 130, 142, 147, 180, 196, 255, 297, 318, 337, 355, 365, 378, 452, 495, 544, 547, 570, 610, 645, 711, 783, 1014, 1060, 1100,                                                                                                 |

|                                                     |                                                                                                                                                                                                                                             |
|-----------------------------------------------------|---------------------------------------------------------------------------------------------------------------------------------------------------------------------------------------------------------------------------------------------|
|                                                     | 1172, 1180, 1215, 1225, 1241, 1299, 1310, 1405, 1444, 1488, 1536, 1622, 3170, 3258, 3862, 3983                                                                                                                                              |
| PC2a                                                | 26, 40, 52, 65, 85, 133, 145, 152, 193, 215, 221, 228, 292, 294, 297, 333, 366, 448, 522, 536, 554, 591, 619, 696, 755, 902, 934, 985, 1090, 1154, 1161, 1236, 1268, 1274, 1309, 1317, 1351, 1375, 1431, 1441, 1619, 3167, 3234, 3873, 3995 |
| PC2b                                                | 29, 44, 64, 80, 82, 134, 147, 170, 181, 202, 225, 261, 298, 320, 332, 354, 451, 521, 537, 553, 600, 625, 701, 757, 895, 941, 950, 1079, 1167, 1189, 1241, 1243, 1267, 1309, 1314, 1330, 1351, 1413, 1436, 1606, 3147, 3237, 3872, 3999      |
| (CF <sub>3</sub> ) <sub>2</sub> COCH <sub>2</sub> F | 51, 54, 71, 124, 162, 175, 210, 305, 310, 333, 353, 465, 498, 544, 552, 581, 613, 671, 726, 788, 1016, 1084, 1132, 1179, 1188, 1205, 1248, 1259, 1299, 1321, 1408, 1448, 1509, 1549, 3146, 3234                                             |
| (CF <sub>3</sub> ) <sub>2</sub> CHOCHF              | 35, 44, 71, 105, 151, 181, 223, 291, 295, 332, 364, 447, 522, 537, 554, 593, 593, 620, 697, 757, 901, 934, 981, 1095, 1162, 1166, 1242, 1263, 1273, 1313, 1320, 1347, 1366, 1419, 1434, 3133, 3245                                          |
| OH                                                  | 3757                                                                                                                                                                                                                                        |
| H <sub>2</sub> O                                    | 1596, 3887, 4012                                                                                                                                                                                                                            |

---

**Table S2.** Relative energies in kcal mol<sup>-1</sup> with zero-point energy correction for the reactants, reactant complexes, transition states, product complexes and products.

| Species                                                                | M06-2X/6-311++G(d,p) |
|------------------------------------------------------------------------|----------------------|
| (CF <sub>3</sub> ) <sub>2</sub> CHOCH <sub>2</sub> F + OH              | 0.00                 |
| RC1                                                                    | -3.91                |
| RC2a                                                                   | -4.88                |
| RC2b                                                                   | -4.69                |
| TS1                                                                    | 1.52                 |
| TS2a                                                                   | 1.42                 |
| TS2b                                                                   | 3.50                 |
| PC1                                                                    | -23.18               |
| PC2a                                                                   | -22.64               |
| PC2b                                                                   | -19.00               |
| (CF <sub>3</sub> ) <sub>2</sub> COCH <sub>2</sub> F + H <sub>2</sub> O | -16.52               |
| (CF <sub>3</sub> ) <sub>2</sub> CHOCHF + H <sub>2</sub> O              | -16.77               |

**Table S3.** Harmonic vibrational frequencies of reactants, transition states and products involved in the thermal decomposition and oxidation reactions of  $(\text{CF}_3)_2\text{CHOCHFO}$  at M06-2X/6-31+G(d,p) level of theory.

| Species                         | Vibrational frequencies ( $\text{cm}^{-1}$ )                                                                                                                                                                                                 |
|---------------------------------|----------------------------------------------------------------------------------------------------------------------------------------------------------------------------------------------------------------------------------------------|
| $(\text{CF}_3)_2\text{CHOCHFO}$ | 43, 55, 69, 82, 139, 158, 232, 268, 297, 327, 346, 354, 503, 520, 537, 553, 563, 602, 663, 700, 755, 907, 937, 982, 1116, 1146, 1159, 12310, 1232, 1269, 1297, 1305, 1325, 1362, 1380, 1426, 1441, 3014, 3143                                |
| TS3                             | 673i, 42, 60, 69, 91, 137, 166, 197, 227, 294, 299, 331, 379, 450, 481, 533, 537, 553, 602, 679, 694, 754, 888, 926, 1045, 1120, 1245, 1258, 1292, 1309, 1334, 1360, 1361, 1419, 1565, 3125, 3216                                            |
| TS4                             | 564i, 40, 53, 69, 86, 137, 163, 178, 258, 294, 302, 334, 351, 437, 454, 524, 537, 554, 599, 694, 729, 783, 920, 1007, 1091, 1163, 1246, 1257, 1273, 1314, 1315, 1384, 1424, 1425, 1564, 3164, 3214                                           |
| TS5                             | 1087i, 31, 41, 66, 74, 134, 160, 246, 259, 296, 329, 341, 375, 513, 537, 540, 552, 584, 609, 683, 690, 700, 755, 807, 917, 941, 975, 1162, 1172, 1226, 1245, 1275, 1309, 1323, 1362, 1424, 1433, 1811, 3165                                  |
| TS6                             | 1128i, 29, 39, 53, 64, 83, 128, 140, 145, 159, 220, 252, 285, 299, 330, 352, 367, 504, 511, 538, 540, 554, 597, 651, 700, 735, 783, 907, 938, 1026, 1082, 1160, 1168, 1198, 1236, 1239, 1276, 1300, 1324, 1357, 1425, 1432, 1639, 1722, 3146 |
| $(\text{CF}_3)_2\text{CHO}$     | 32, 87, 149, 240, 248, 293, 321, 409, 463, 521, 540, 566, 611, 735, 744, 868, 923, 1169, 1175, 1242, 1265, 1291, 1305, 1334, 1382, 3090, 5412                                                                                                |
| CHFO                            | 673, 1041, 1129, 1389, 1950, 3196                                                                                                                                                                                                            |
| $(\text{CF}_3)_2\text{CHOCHO}$  | 14, 41, 70, 142, 144, 163, 263, 299, 311, 340, 353, 390, 525, 538, 551, 562, 698, 730, 759, 916, 940, 1034, 1139, 1163, 1205, 1243, 1268, 1305, 1326, 1362, 1416, 1424, 1450, 1937, 3076, 3096                                               |
| $(\text{CF}_3)_2\text{CHOCFO}$  | 27, 63, 67, 79, 137, 156, 251, 262, 297, 330, 342, 387, 516, 537, 552, 555, 630, 674, 703, 754, 770, 908, 947, 963, 1167, 1189, 1246, 1265, 1284, 1319, 1326, 1367, 1425, 1429, 2011, 3174                                                   |
| $\text{HO}_2$                   | 1266, 1459, 3710                                                                                                                                                                                                                             |
| $\text{O}_2$                    | 1774                                                                                                                                                                                                                                         |

**Table S4** Thermochemical data for the thermal decomposition and oxidation pathways of  $(\text{CF}_3)_2\text{CHOCHFO}$  radical calculated at M06-2X/6-31+G(d,p) level of theory. All values are in  $\text{kcal.mol}^{-1}$ .

| Reaction channels | $\Delta_r\text{H}^\circ_{298}$ | $\Delta_r\text{G}^\circ_{298}$ | $\Delta\text{G}^\ddagger$ |
|-------------------|--------------------------------|--------------------------------|---------------------------|
| Reaction 3        | 14.67                          | 1.86                           | 16.17                     |
| Reaction 4        | 28.10                          | 18.12                          | 25.36                     |
| Reaction 5        | 6.60                           | -1.14                          | 15.38                     |
| Reaction 6        | -41.48                         | -42.74                         | 14.84                     |

**Table S5.** Calculated energy barriers (in kcal mol<sup>-1</sup>) for the thermal decomposition and oxidation pathways of (CF<sub>3</sub>)<sub>2</sub>CHOCHFO radical.

| <b>Reaction Channels</b>            | <b>M06-2X/<br/>6-311++G(d,p)</b> |
|-------------------------------------|----------------------------------|
| TS3 ( C-O bond scission)            | 15.51                            |
| TS4 ( C-F bond scission)            | 24.90                            |
| TS5 ( C-H bond scission)            | 15.36                            |
| TS6 (Reaction with O <sub>2</sub> ) | 4.91                             |

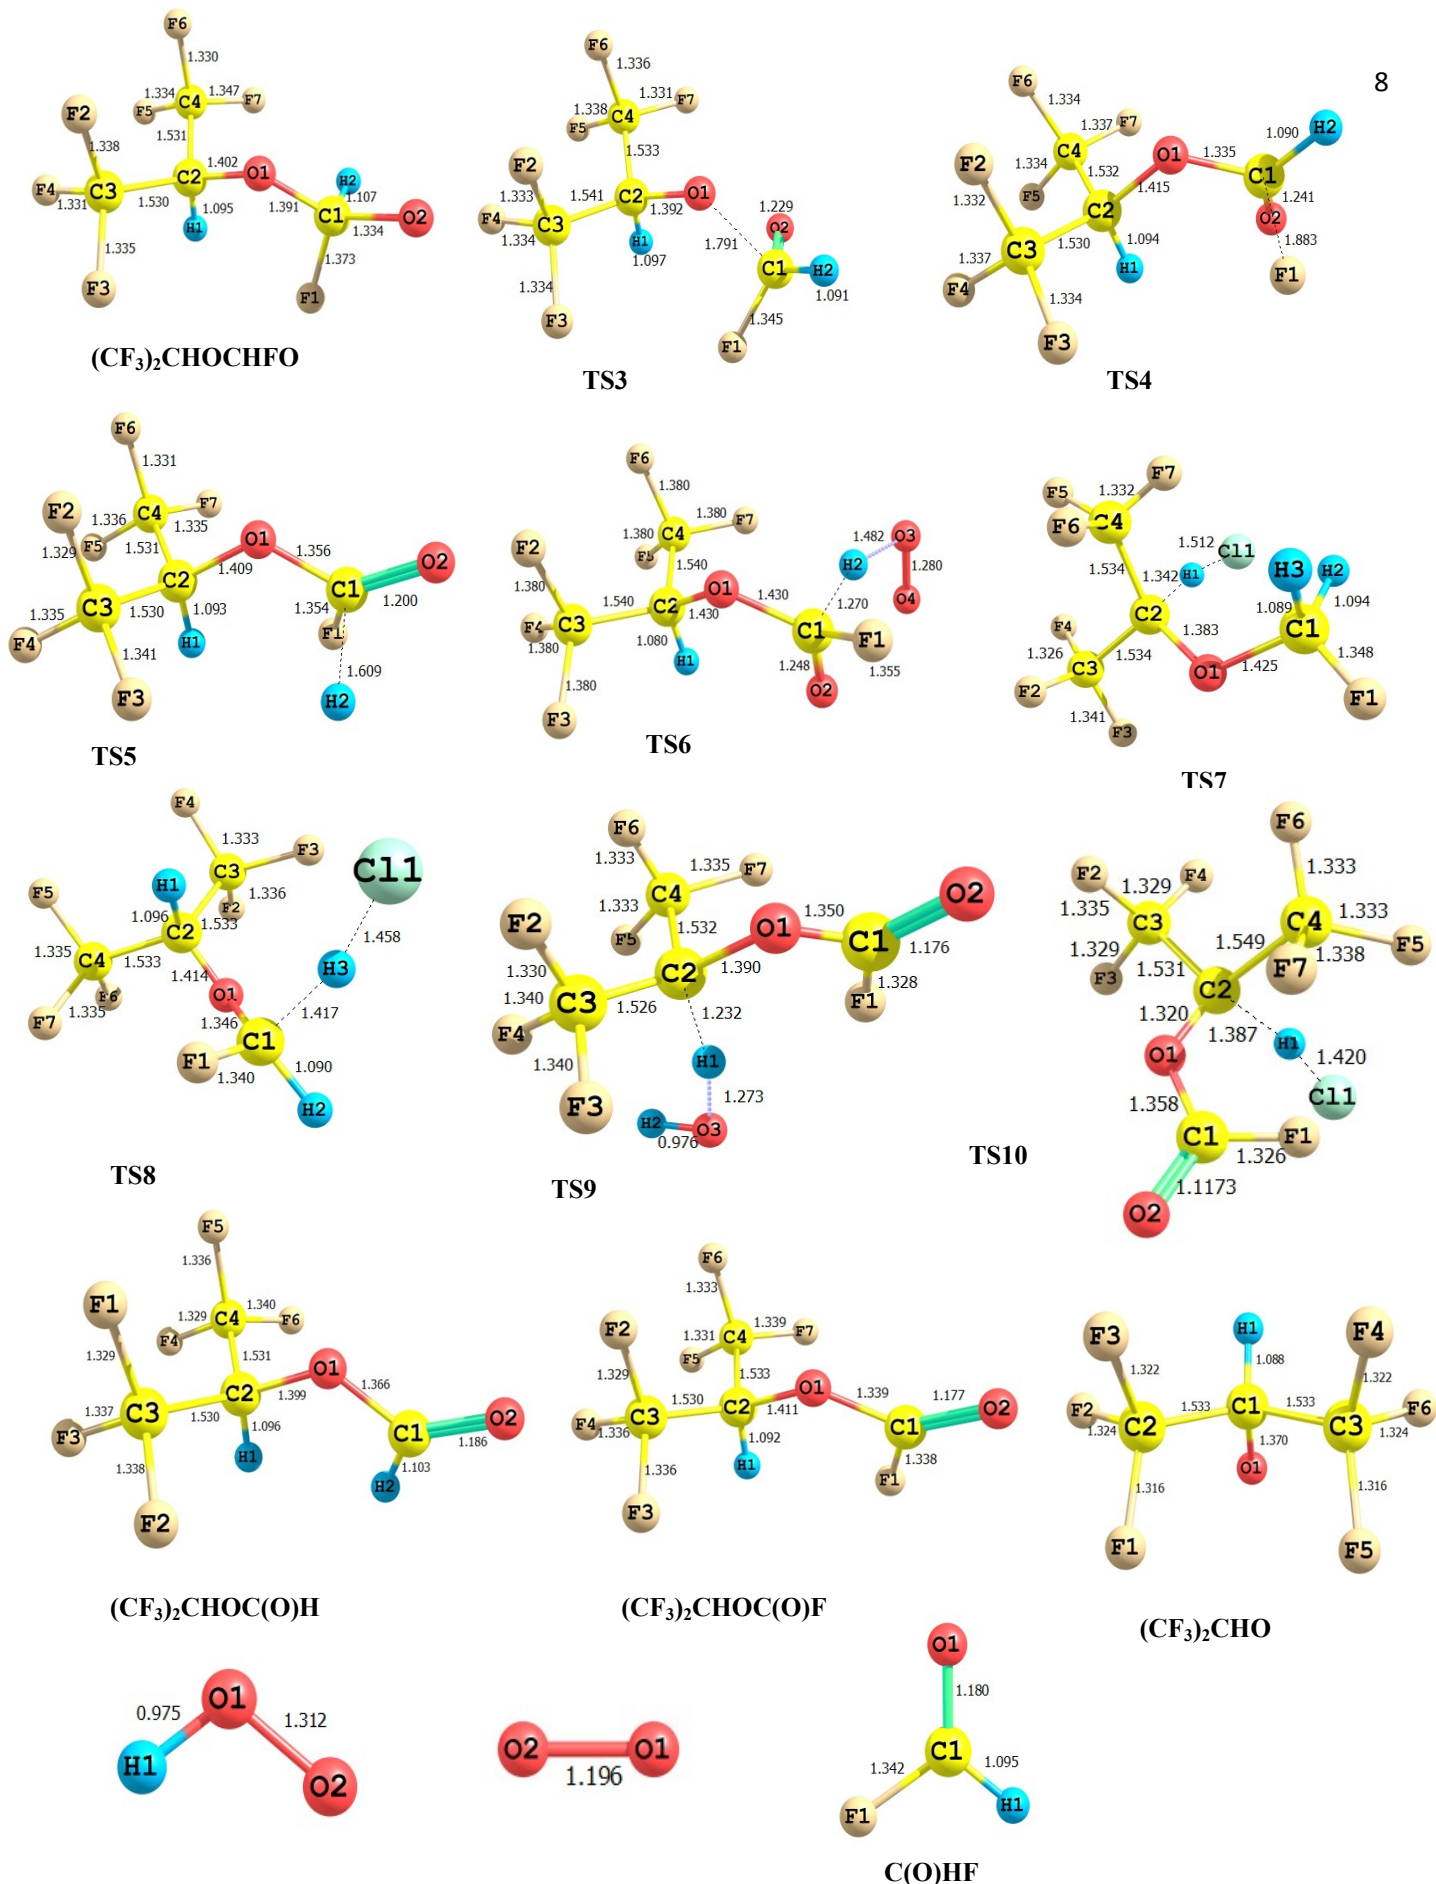

**Fig. S1** Optimized geometries of reactants, transition states and products involved in thermal decomposition and oxidation of alkoxy radical at M06-2X/6-31+G(d,p) method. Bond lengths are in angstroms.
